# Supplementary material
Source: publisher figshare collection journal article supplement (https://gsapubs.figshare.com/ndownloader/files/22411110)
Supplement: Supplementary file 1 [file 22411110]

## Sheet: Ages
Sample	UTM WGS84 19S		Lithology	Method and material	Age (Ma±2σ)(*ka±2σ)(**yBP)	Reference
	E	N
010314-4A	549485	7095373	PJB bomb	Ar/Ar Groundmass	8.802±0.096	Naranjo et al. (2016)
010314-8	546729	7104629	Andesitic dique	Ar/Ar Groundmass	10.58±0.11	Naranjo et al. (2016)
010314-9A	541567	7111821	Ignimbrite	Ar/Ar Hornblende	13.03±0.14	Naranjo et al. (2016)
010314-9B	541567	7111821	Ignimbrite	Ar/Ar Biotite	12.1±0.2	Naranjo et al. (2016)
010314-9C	541567	7111821	Ignimbrite	Ar/Ar Biotite	11.95±0.10	Naranjo et al. (2016)
020314-2	540274	7.1148e+06	Ignimbrite	Ar/Ar Biotite	11.50±0.04	Naranjo et al. (2016)
020314-5A	539603	7112800	Vitrophyric ignimbrite	Ar/Ar Biotite	11.58±0.03	Naranjo et al. (2016)
020314-5B	539595	7112635	Andesite	Ar/Ar Groundmass	9.08±0.04	Naranjo et al. (2016)
020314-7B	537789	7.11239e+06	Ignimbrite	Ar/Ar Biotite	11.45±0.04	Naranjo et al. (2016)
020314-8	534214	7.11301e+06	Ignimbrite	Ar/Ar Biotite	11.55±0.03	Naranjo et al. (2016)
020314-9	534325	7113820	Vitrophyric ignimbrite	Ar/Ar Biotite	11.02±0.09	Naranjo et al. (2016)
021314-6A	538374	7112205	Ignimbrite	U-Pb zircon	1.20±0.04	Naranjo et al. (2016)
031207-8	543900	7219809	Andesite	Ar/Ar Biotite	400±60(*)	Naranjo (2010)
060912-10D	533473	7.11658e+06	Ignimbrite	U-Pb zircon	12.1±0.1	Naranjo et al. (2016)
060912-8A	533728	7.11637e+06	Ignimbrite	U-Pb zircon	11.8 ± 0.098	Naranjo et al. (2016)
060912-8B	533728	7.11637e+06	Ignimbrite	Ar/Ar Biotite	11.926±0.085	Naranjo et al. (2016)
061207-12	549317	7219701	Andesite	Ar/Ar Biotite	42±17(*)	Naranjo (2010)
061207-3	546716	7220994	Andesite	Ar/Ar Plagioclase	330±100(*)	Naranjo (2010)
070912-2	531511	7.13008e+06	Vitrophyric ignimbrite	K-Ar Biotite	11.3±0.7	Naranjo and Cornejo (1992)
080213-12A	539092	7142718	Ignimbrite	K-Ar Biotite	17.4±1.0	Naranjo et al. (2013a)
080213-12B	539092	7142718	Ignimbrite	K-Ar Biotite	17.7±0.9	Naranjo et al. (2013a)
080213-13A	542546	7142670	Ignimbrite	K-Ar Biotite	17.6±0.9	Naranjo et al. (2013a)
080213-13B	542546	7147257	Ignimbrite	K-Ar Biotite	16.7±0.8	Naranjo et al. (2013a)
090213-1D	513107	7128056	Andesite	K-Ar Whole rock	10.8±0.6	Naranjo et al. (2013a)
090213-6D	545597	7128704	PJB bomb	K-Ar Whole rock	13.4±0.5	Naranjo et al. (2013a)
090513-8A	547094	7099982	Ignimbrite	Ar/Ar Biotite	3.899±0.046	Naranjo et al. (2016)
090513-8A	547094	7099982	Ignimbrite	Ar/Ar Biotite	3.53±0.06	Naranjo et al. (2016)
090513-8B	547094	7099982	Ignimbrite	Ar/Ar Biotite	3.831±0.025	Naranjo et al. (2016)
100413-2	503655	7091527	Ignimbrite	U-Pb zircon	18.7±0.08	Naranjo et al. (2016)
100413-5	504591	7089713	Ignimbrite	U-Pb zircon	16.02±0.08	Naranjo et al. (2016)
100513-11	556774	7090867	Ignimbrite	K-Ar Biotite	4.1±0.8	Naranjo et al. (2016)
100513-12	562682	7094679	Ignimbrite	K-Ar Biotite	4.3±0.8	Naranjo et al. (2016)
100513-13	552987	7091029	Ignimbrite	K-Ar Biotite	3.2±0.4	Naranjo et al. (2016)
100513-1A	547055	7099707	Vitrophyric ignimbrite	Ar/Ar Hornblende	8.13±0.09	Naranjo et al. (2016)
100513-5A	548382	7.09847e+06	Ignimbrite	Ar/Ar Biotite	9.49±0.03	Naranjo et al. (2016)
100513-5B	548382	7.09847e+06	Ignimbrite	Ar/Ar Biotite	9.09±0.04	Naranjo et al. (2016)
100513-5C	548382	7.09847e+06	Ignimbrite	Ar/Ar Biotite	8.66±0.03	Naranjo et al. (2016)
110513-1	510991	7.10335e+06	Andesite	Ar/Ar Groundmass	7.55±0.03	Naranjo et al. (2016)
110513-10	506302	7066952	Interbedded ignimbrite	U-Pb zircon	21.5±0.2	Naranjo et al. (2016)
110513-2	519542	7.07724e+06	Andesite	Ar/Ar Hornblende	1.1±0.2	Naranjo et al. (2016)
110513-2	519542	7.07724e+06	Andesite	Ar/Ar Groundmass	397±14(*)	Naranjo et al. (2016)
110513-4A	518780	7.07604e+06	Andesite	Ar/Ar Groundmass	404±11(*)	Naranjo et al. (2016)
110513-5	519222	7072784	Andesite	Ar/Ar Hornblende	630±130(*)	Naranjo et al. (2016)
120413-3	549029	7088865	Ignimbrite	Ar/Ar Biotite	8.67±0.16	Naranjo et al. (2016)
120513-1	500744	7065040	Interbedded ignimbrite	U-Pb zircon	22.7±0.1	Naranjo et al. (2016)
120513-2D	517007	7043885	Ignimbrite	Ar/Ar Hornblende	4.23±0.39	Naranjo et al. (2016)
120513-2E	517007	7043885	Ignimbrite	Ar/Ar Biotite	3.843±0.032	Naranjo et al. (2016)
120513-2E	517007	7043885	Ignimbrite	U-Pb zircon	3.63±0.02	Naranjo et al. (2016)
140413-10A	542040	7112680	Ignimbrite	Ar/Ar Biotite	12.93±0.05	Naranjo et al. (2016)
140413-10C	542040	7112680	Ignimbrite	Ar/Ar Biotite	12.93±0.06	Naranjo et al. (2016)
140513-1A	550428	7117524	Ignimbrite	Ar/Ar Biotite	8.31±0.12	Naranjo et al. (2016)
140513-1B	550428	7117524	Ignimbrite	Ar/Ar Biotite	8.71±0.03	Naranjo et al. (2016)
140513-5	553624	7110362	Ignimbrite	Ar/Ar Biotite	8.97±0.11	Naranjo et al. (2016)
140513-8	554060	7105467	Vitrophyric ignimbrite	Ar/Ar Biotite	8.65±0.03	Naranjo et al. (2016)
140513-9	554165	7105539	Ignimbrite	Ar/Ar Biotite	8.55±0.03	Naranjo et al. (2016)
150413-10A	551817	7095920	Andesite	Ar/Ar Groundmass	9.79±0.05	Naranjo et al. (2016)
150413-4	530227	7.0791e+06	Andesite	Ar/Ar Groundmass	287±15(*)	Naranjo et al. (2016)
150413-5	530966	7.07821e+06	Andesite	Ar/Ar Groundmass	650±30(*)	Naranjo et al. (2016)
150413-6	532497	7.07698e+06	Andesite	Ar/Ar Groundmass	820±40(*)	Naranjo et al. (2016)
150413-7	539959	7.08103e+06	Andesite	Ar/Ar Hornblende	840±150(*)	Naranjo et al. (2016)
150413-7	539959	7.08103e+06	Andesite	Ar/Ar Groundmass	465±17(*)	Naranjo et al. (2016)
150413-8	543569	7080618	Andesite	Ar/Ar Groundmass	500±50(*)	Naranjo et al. (2016)
150513-7	556700	7122415	Ignimbrite	Ar/Ar Biotite	17.95±0.17	Naranjo et al. (2016)
150513-9	550667	7117002	Ignimbrite	Ar/Ar Biotite	9.56±0.03	Naranjo et al. (2016)
160513-1	454375	7082650	Ignimbrite	U-Pb zircon	9.28±0.16	Naranjo et al. (2016)
160513-2	448381	7080930	Ignimbrite	U-Pb zircon	16.7±0.08	Naranjo et al. (2016)
170511-2	507392	7154848	Andesite	Ar/Ar Groundmass	14.11±0.08	Naranjo et al. (2013a)
180511-23	551255	7146820	Porphyde	U-Pb zircon	266.8±4	Naranjo et al. (2013a)
180511-24	554252	7146257	Dacite	U-Pb zircon	265.1±2.6	Naranjo et al. (2013a)
180511-27	555495	7143906	Microdiorite	U-Pb zircon	270.7±4	Naranjo et al. (2013a)
180511-29	557084	7144546	Granitoide	U-Pb zircon	253.7±1.9	Naranjo et al. (2013a)
190214-2	548300	7100403	Vitrophyric ignimbrite	Ar/Ar Biotite	8.466±0.015	Naranjo et al. (2016)
190511-25	530218	7.13501e+06	Andesite	Ar/Ar Groundmass	16.31±0.07	Naranjo et al. (2013a)
200214-12D	558056	7116745	Vitrophyric ignimbrite	Ar/Ar Matrix	18.23±0.04	Naranjo et al. (2016)
200214-3	547027	7098891	Ignimbrite	Ar/Ar Biotite	9.321±0.014	Naranjo et al. (2016)
200511-1C	518085	7182931	Pumice	Ar/Ar Biotite	15.6±1.1	Naranjo et al. (2013b)
200511-26	537102	7184878	Andesite	Ar/Ar Groundmass	1.762±0.012	Naranjo et al. (2013b)
200511-27	537191	7184681	Andesite	Ar/Ar Hornblende	270±20(*)	Naranjo et al. (2013b)
200511-29A	537380	7190429	Andesite	Ar/Ar Groundmass	23±17(*)	Naranjo et al. (2013b)
200511-29B	537380	7190429	Andesite	Ar/Ar Groundmass	80±40(*)	Naranjo et al. (2013b)
200511-29C	537380	7190429	Andesite	Ar/Ar Biotite	142±14(*)	Naranjo et al. (2013b)
200511-4A	516691	7185560	Ignimbrite	Ar/Ar Hornblende	17.93±0.17	Naranjo et al. (2013b)
200511-5	517537	7185222	Ignimbrite	Ar/Ar Biotite	16.55±0.05	Naranjo et al. (2013b)
210214-2A	549055	7094278	Andesite	Ar/Ar Groundmass	9.16±0.04	Naranjo et al. (2016)
210214-7A	549520	7088671	Ignimbrite	Ar/Ar Biotite	9.328±0.014	Naranjo et al. (2016)
210214-7B	549520	7088671	Ignimbrite	Ar/Ar Biotite	9.389±0.018	Naranjo et al. (2016)
210214-7C	549520	7088671	Ignimbrite	Ar/Ar Biotite	9.36±0.02	Naranjo et al. (2016)
210511-15A	529319	7142898	Ignimbrite	Ar/Ar Whole rock	18.76±0.16	Naranjo et al. (2013a)
210511-18A	530277	7.14278e+06	Ignimbrite	Ar/Ar Biotite	16.57±0.06	Naranjo et al. (2013a)
210511-18B	530277	7.14277e+06	Ignimbrite	Ar/Ar Biotite	16.56±0.06	Naranjo et al. (2013a)
210511-18C	530270	7.14275e+06	Ignimbrite	Ar/Ar Biotite	16.51±0.06	Naranjo et al. (2013a)
210511-18E	530264	7.14274e+06	Pumice	Ar/Ar Biotite	16.43±0.08	Naranjo et al. (2013a)
210511-20	530569	7.14295e+06	Ignimbrite	Ar/Ar Hornblende	20.5±0.3	Naranjo et al. (2013a)
210511-21	530702	7.14292e+06	Ignimbrite	Ar/Ar Hornblende	17.6±0.2	Naranjo et al. (2013a)
210511-8	528731	7.14797e+06	Andesite	Ar/Ar Whole rock	5.22±0.06	Naranjo et al. (2013a)
220511-29	560053	7.22423e+06	Andesite	Ar/Ar Groundmass	130±40(*)	Naranjo et al. (2013b)
230214-10B	511372	7095198	Ignimbrite	Ar/Ar Biotite	9.48±0.09	Naranjo et al. (2016)
230214-15A	513099	7096690	Ignimbrite	Ar/Ar Biotite	9.86±0.13	Naranjo et al. (2016)
230214-15A	513099	7096690	Ignimbrite	U-Pb zircon	9.9±0.055	Naranjo et al. (2016)
230214-15B	513075	7096720	Ignimbrite	U-Pb zircon	3.54±0.02	Naranjo et al. (2016)
230214-19B	507889	7098161	Pumice	Ar/Ar Biotite	16.572±0.040	Naranjo et al. (2016)
230511-10	537363	7210208	Andesite	Ar/Ar Groundmass	5.37±0.03	Naranjo et al. (2013b)
230511-11	538889	7.20857e+06	Andesite	Ar/Ar Biotite	406±18(*)	Naranjo et al. (2013b)
230511-12	538649	7.20531e+06	Andesite	Ar/Ar Groundmass	448±13(*)	Naranjo et al. (2013b)
230511-15	539596	7.19865e+06	Andesite	Ar/Ar Groundmass	2.767±0.017	Naranjo et al. (2013b)
230511-16	540965	7.1974e+06	Andesite	Ar/Ar Groundmass	199±14(*)	Naranjo et al. (2013b)
230511-18	541821	7196354	Andesite	Ar/Ar Groundmass	3.50±0.02	Naranjo et al. (2013b)
230511-9	537395	7211392	Andesite	Ar/Ar Groundmass	2.04±0.02	Naranjo et al. (2013b)
240214-4A	513287	7095662	Andesite	Ar/Ar Groundmass	9.08±0.048	Naranjo et al. (2016)
260214-3	547651	7088595	Pumice	Ar/Ar Biotite	3.814±0.019	Naranjo et al. (2016)
260214-4	545856	7087166	Ignimbrite	Ar/Ar Biotite	3.857±0.030	Naranjo et al. (2016)
260214-7A	564807	7088705	Ignimbrite	Ar/Ar Biotite	3.783±0.022	Naranjo et al. (2016)
260214-7B	564807	7088705	Ignimbrite	Ar/Ar Biotite	3.788±0.027	Naranjo et al. (2016)
260713-1	516222	7.10404e+06	Andesite	Ar/Ar Biotite	2.84±0.02	Naranjo et al. (2016)
260713-3	511479	7.10321e+06	Dacitic dome	Ar/Ar Groundmass	22.75±0.16	Naranjo et al. (2016)
260713-9A	506531	7098650	Ignimbrite	Ar/Ar Biotite	16.35±0.04	Naranjo et al. (2016)
261002-4	545434	7219405	Andesite	K-Ar 'unspike' Whole rock	116±26(*)	Naranjo (2010)
261002-5	545266	7219806	Organic sediment	AMS	2.460±40(**)	Naranjo (2010)
261002-8	546149	7218393	Organic sediment	AMS	4.850±40(**)	Naranjo (2010)
270713-3	505982	7098757	Ignimbrite	Ar/Ar Biotite	4.17±0.10	Naranjo et al. (2016)
270713-5	505901	7083158	Pumice	Ar/Ar Biotite	9.34±0.02	Naranjo et al. (2016)
271002-2	556729	7215817	Organic sediment	AMS	6.510±40(**)	Naranjo (2010)
AR100	636944	7174816	Trachidacite	Ar/Ar Hornblende	9.84±0.24	Richards et al. (2006)
AR12	548781	7263396	Dacite block	Ar/Ar Biotite	0.150±0.005	Richards and Villeneuve (2004)
AR127	612641	7166480	Dacite	Ar/Ar Biotite	6.39±0.07	Richards et al. (2006)
AR139	631731	7170350	Latite	Ar/Ar Hornblende	10.09±0.30	Richards et al. (2006)
AR142	627750	7166073	Ignimbrite	Ar/Ar Biotite	1.59±0.08	Richards et al. (2006)
AR146	627167	7171285	Latite	Ar/Ar Hornblende	9.71±0.48	Richards et al. (2006)
AR15	544154	7261930	Dacite	Ar/Ar Biotite	0.048±0.012	Richards and Villeneuve (2004)
AR159	634264	7180417	Ignimbrite	Ar/Ar Biotite	10.89±0.09	Richards et al. (2006)
AR163	628551	7192646	Andesite	Ar/Ar Biotite	6.07±0.05	Richards et al. (2006)
AR20	544613	7257150		Ar/Ar Hornblende	9.80±0.19	Richards and Villeneuve (2004)
AR203	590161	7173106	Dacite	Ar/Ar Biotite	8.94±0.07	Richards et al. (2006)
AR21	544613	7257150		Ar/Ar Biotite	9.92±0.10	Richards and Villeneuve (2004)
AR213	589103	7181991	Ignimbrite	Ar/Ar Biotite	5.36±0.07	Richards et al. (2006)
AR219	593129	7184691	Dacite	Ar/Ar Biotite	5.15±0.05	Richards et al. (2006)
AR221	597416	7183459	Trachidacite	Ar/Ar Hornblende	9.52±0.37	Richards et al. (2006)
AR222	592094	7176816	Dacite	Ar/Ar Biotite	8.91±0.09	Richards et al. (2006)
AR234	600185	7168235	Dacite	Ar/Ar Biotite	9.09±0.11	Richards et al. (2006)
AR245	599117	7179202	Ignimbrite	Ar/Ar Biotite	10.11±0.07	Richards et al. (2006)
AR25	549380	7257915		Ar/Ar Biotite	5.51±0.07	Richards and Villeneuve (2004)
AR251	602646	7178280	Dacitic dome	Ar/Ar Biotite	2.48±0.04	Richards et al. (2006)
AR254	600769	7173423	Dacite	Ar/Ar Biotite	5.71±0.06	Richards et al. (2006)
AR257	604017	7181682	Trachidacite	Ar/Ar Hornblende	9.79±0.32	Richards et al. (2006)
AR259	601302	7186529	Ignimbrite	Ar/Ar Biotite	10.21±0.05	Richards et al. (2006)
AR-318	556724	7217212	Andesite	Ar/Ar Biotite	2.06±0.04	Richards et al. (2013)
AR-318	556732	7217186	Andesite	Ar/Ar Biotite	2.06±0.04	Richards et al. (2013)
AR-325	554056	7213056	Andesite	Ar/Ar Biotite	0.33±0.04	Richards et al. (2013)
AR-327	554692	7208843	Dacite	Ar/Ar Biotite	0.67±0.02	Richards et al. (2013)
AR33	563381	7248144		Ar/Ar Hornblende	11.94±0.13	Richards and Villeneuve (2004)
AR-331	559465	7206141	Ignimbrite	Ar/Ar Biotite	2.14±0.02	Richards et al. (2013)
AR-337	562112	7199225	Trachidacite	Ar/Ar Hornblende	11.76±0.27	Richards et al. (2013)
AR-340	566583	7196715	Ignimbrite	Ar/Ar Biotite	4.65±0.06	Richards et al. (2013)
AR-341	569678	7193500	Argilic alteration	Ar/Ar Alunite	3.7±0.11	Richards et al. (2013)
AR-346	570314	7200607	Ignimbrite	Ar/Ar Biotite	2.4±0.06	Richards et al. (2013)
AR-351	548976	7174532	Ignimbrite	Ar/Ar Biotite	17.14±0.1	Richards et al. (2013)
AR-357	551638	7177290	Dacite	Ar/Ar Biotite	17.08±0.18	Richards et al. (2013)
AR-387	570340	7180832	Dacite	Ar/Ar Hornblende	6.69±0.19	Richards et al. (2013)
AR-390	570462	7183867	Tuff	Ar/Ar Biotite	6.87±0.09	Richards et al. (2013)
AR4	560668	7256437	Dacite block	Ar/Ar Biotite	0.156±0.005	Richards and Villeneuve (2004)
AR-416	563634	7169135	Ignimbrite	Ar/Ar Biotite	16.39±0.14	Richards et al. (2013)
AR-421	576164	7177814	Andesite	Ar/Ar Hornblende	9.95±0.39	Richards et al. (2013)
AR-50	564505	7226493		Ar/Ar	342±25	Richards and Villeneuve (2002)
AR-50	564477	7.22651e+06	Andesite	Ar/Ar Biotite	342±25(*)	Richards and Villeneuve (2002)
AR-73	570490	7231357		Ar/Ar	457±13	Richards and Villeneuve (2002)
AR-73	570464	7.23138e+06	Ignimbrite	Ar/Ar Biotite	457±13(*)	Richards and Villeneuve (2002)
AR8	547519	7261153	Dacite	Ar/Ar Biotite	0.401±0.006	Richards and Villeneuve (2004)
CO-114	553523	7.10551e+06	Andesite	K-Ar Whole rock	13.3±0.9	Clavero et al. (1998)
CO-115	557898	7.10762e+06	Andesite	K-Ar Whole rock	3.1±0.6	Clavero et al. (1998)
CO-117**	560002	7.12181e+06	Ignimbrite	K-Ar Whole rock	4.0±0.6	Clavero et al. (1998)
CO-131	556493	7.11269e+06	Andesite	K-Ar Whole rock	11.8±0.5	Clavero et al. (1998)
CYKLOP-94-1b1	544789	7100761			5.9	Schnurr et al. (2007)
GCo-253	506607	7099738	Andesite	K-Ar Whole rock	15.6±0.5	Clavero et al. (1998)
GCo-255	500425	7.10487e+06	Andesite	K-Ar Whole rock	15.8±0.7	Clavero et al. (1998)
GCo-257	508912	7.09601e+06	Vitrophyric ignimbrite	K-Ar Whole rock	19.1±0.7	Clavero et al. (1998)
GCo-260	514745	7.09836e+06	Andesite	K-Ar Whole rock	5.5±0.3	Clavero et al. (1998)
GCo-264	513591	7.1031e+06	Pyroxene andesite	K-Ar Whole rock	5.5±0.3	Clavero et al. (1998)
GCO-265	517618	7.09529e+06	Dacite	K-Ar Biotite	8.0±0.6	Clavero et al. (1998)
GCo-267	516930	7.09843e+06	Andesite	K-Ar Whole rock	10.0±0.4	Clavero et al. (1998)
GCo-268	518980	7.10239e+06	Pyroxene andesite	K-Ar Whole rock	5.9±0.2	Clavero et al. (1998)
GCo-270	522823	7.0983e+06	Dacite	K-Ar Biotite	9.3±0.6	Clavero et al. (1998)
GCo-277	522692	7.10666e+06	Dacite	K-Ar Biotite	10.6±0.8	Clavero et al. (1998)
GCo-280	522376	7.10873e+06	Andesite	K-Ar Whole rock	11.2±0.4	Clavero et al. (1998)
GCO-283	514162	7100179	Granitoide	U-Pb zircon	263.8 ± 3.4	Clavero et al. (1998)
GCo-289	508183	7.09528e+06	Ignimbrite	K-Ar Whole rock	23.5±1.5	Clavero et al. (1998)
GCO-296	500275	7.1004e+06	Hornblende andesite	K-Ar Whole rock	18.8±0.7	Clavero et al. (1998)
GCo-299	504482	7.08991e+06	Welded tuff	K-Ar Biotite	16.4±0.6	Clavero et al. (1998)
Gco-306	510991	7.10143e+06	Dacite block	K-Ar Whole rock	20.7±0.8	Clavero et al. (1998)
GCo-310	521857	7.11203e+06	Basaltic andesite	K-Ar Whole rock	10.2±0.4	Clavero et al. (1998)
GCo-317	517646	7.12155e+06	Pyroxene andesite	K-Ar Whole rock	21.1±0.9	Clavero et al. (1998)
GCo-318	517258	7.12178e+06	Ignimbrite	K-Ar Biotite	12.7±0.6	Clavero et al. (1998)
GCo-326	509612	7.10804e+06	Interbedded ash level	K-Ar Biotite	3.8±0.7	Clavero et al. (1998)
GCo-343	501578	7.12298e+06	Andesite	K-Ar Whole rock	10.0±0.4	Clavero et al. (1998)
GCo-344	501840	7.12222e+06	Dacite	K-Ar Whole rock	13.3±1.0	Clavero et al. (1998)
GCo-349	503273	7.11759e+06	Basaltic andesite	K-Ar Whole rock	12.9±0.7	Clavero et al. (1998)
GCo-350	500658	7.11425e+06	Andesite	K-Ar Whole rock	12.8±0.6	Clavero et al. (1998)
GCo-355	530509	7.10927e+06	Andesite	K-Ar Whole rock	9.8±0.4	Clavero et al. (1998)
GCO-359	529042	7.11024e+06	Andesite block	K-Ar Whole rock	11.8±0.6	Clavero et al. (1998)
GCo-375	514041	7.12204e+06	Andesite	K-Ar Whole rock	11.0±0.4	Clavero et al. (1998)
GCo-383	511403	7.11983e+06	Andesite	K-Ar Whole rock	13.9±0.5	Clavero et al. (1998)
GCO-391	511294	7.09149e+06	Vitrophyric ignimbrite	Ar/Ar Whole rock	18.361±0.203	Clavero et al. (1998)
GH-180	522990	7.16923e+06	Andesite	K-Ar Whole rock	5.8±0.4	Naranjo and Cornejo (1992)
GH-209	552699	7.13936e+06	Andesite	K-Ar Whole rock	18.3±0.7	Naranjo and Cornejo (1992)
GH-210	552589	7.13558e+06	Andesite	K-Ar Whole rock	19.9±0.8	Naranjo and Cornejo (1992)
GH-241	534153	7.22235e+06	Andesite	K-Ar Whole rock	2.6±0.5	Naranjo and Cornejo (1992)
GH-252	526953	7.21893e+06	Andesite	K-Ar Quartz-Alunite	19.3±1.1	Naranjo and Cornejo (1992)
GH-43	501674	7.19358e+06	Andesite	K-Ar Quartz-Alunite	21.1±0.9	Naranjo and Cornejo (1992)
GH-70	511760	7.17232e+06	Andesite	K-Ar Quartz-Alunite	19.2±3.9	Naranjo and Cornejo (1992)
GH-95	502159	7.19351e+06	Andesite	K-Ar Quartz-Alunite	18.1±0.8	Naranjo and Cornejo (1992)
GN-101A	541966	7.22304e+06	Porphyric andesite	K-Ar Whole rock	23.7±0.9	Naranjo and Cornejo (1992)
GN-10F	518061	7.1831e+06	Ignimbrite	K-Ar Biotite	16.0±0.8	Naranjo and Cornejo (1992)
GN-120A	545251	7.22675e+06	Andesite	K-Ar Whole rock	7.8±0.5	Naranjo and Cornejo (1992)
GN-121	545171	7.22615e+06	Andesite	K-Ar Whole rock	7.1±0.7	Naranjo and Cornejo (1992)
GN-126	545878	7.22267e+06	Andesite	K-Ar Whole rock	5.3±0.4	Naranjo and Cornejo (1992)
GN-145	548000	7214600	Andesite	Ar/Ar Groundmass	150±50(*)	Naranjo (2010)
GN-15	535089	7.23052e+06	Andesite	K-Ar Plagioclase	8.3±0.8	Naranjo and Cornejo (1992)
GN-165A	542236	7.21608e+06	Andesite	Ar/Ar Groundmass	2.43±0.02	Naranjo et al. (2013b)
GN-165A	542236	7.21608e+06	Andesite	K-Ar Whole rock	2.6±0.3	Naranjo and Cornejo (1992)
GN-166	541525	7.21596e+06	Andesite	K-Ar Whole rock	2.6±0.9	Naranjo and Cornejo (1992)
GN-170	538587	7.2151e+06	Andesite	K-Ar Whole rock	3.4±0.6	Naranjo and Cornejo (1992)
GN-173	538455	7.2117e+06	Andesite	K-Ar Whole rock	2.0±0.2	Naranjo and Cornejo (1992)
GN-185	534038	7.20312e+06	Dacite	Ar/Ar Hornblende	5.74±0.18	Naranjo et al. (2013b)
GN-185	534038	7.20312e+06	Dacite	K-Ar Whole rock	5.9±0.8	Naranjo and Cornejo (1992)
GN-197	527352	7.19485e+06	Andesite	K-Ar Whole rock	12.8±0.7	Naranjo and Cornejo (1992)
GN-201	520388	7.19159e+06	Andesite	K-Ar Whole rock	13.1±0.7	Naranjo and Cornejo (1992)
GN-202	519226	7182907	Andesite	K-Ar Whole rock	5.2±0.5	Naranjo and Cornejo (1992)
GN-205	522508	7.18764e+06	Andesite	K-Ar Whole rock	17.7±1.8	Naranjo and Cornejo (1992)
GN-209	510483	7.18859e+06	Andesite	K-Ar Whole rock	10.7±0.7	Naranjo and Cornejo (1992)
GN-217	517698	7.20685e+06	Andesite	K-Ar Whole rock	11.9±0.8	Naranjo and Cornejo (1992)
GN-22	536828	7.22427e+06	Andesite	Ar/Ar Groundmass	7.42±0.1	Naranjo et al. (2013b)
GN-22	536828	7.22427e+06	Andesite	K-Ar Whole rock	7.9±0.4	Naranjo and Cornejo (1992)
GN-221B	521729	7.19668e+06	Dacite	K-Ar Biotite	6.7±0.4	Naranjo and Cornejo (1992)
GN-222	516935	7.19938e+06	Andesite	K-Ar Whole rock	11.2±0.6	Naranjo and Cornejo (1992)
GN-232A	536413	7.21124e+06	Andesite	K-Ar Whole rock	5.3±0.3	Naranjo and Cornejo (1992)
GN-233	538340	7.20062e+06	Andesite	K-Ar Whole rock	2.5±0.9	Naranjo and Cornejo (1992)
GN-245	535783	7.19967e+06	Andesite	K-Ar Whole rock	5.5±0.5	Naranjo and Cornejo (1992)
GN-246	530461	7.20147e+06	Dacite	K-Ar Whole rock	7.0±0.5	Naranjo and Cornejo (1992)
GN-246	530607	7.20169e+06	Dacite	K-Ar Whole rock	7.0±0.5	Naranjo and Cornejo (1992)
GN-248	528183	7.19637e+06	Andesite	K-Ar Whole rock	5.4±0.3	Naranjo and Cornejo (1992)
GN-249	527988	7.19535e+06	Andesite	K-Ar Whole rock	5.7±0.7	Naranjo and Cornejo (1992)
GN-250	507636	7.19271e+06	Andesite	K-Ar Whole rock	11.8±0.4	Naranjo and Cornejo (1992)
GN-256	509966	7.18345e+06	Andesite	K-Ar Whole rock	15.6±0.6	Naranjo and Cornejo (1992)
GN-258B	512601	7.18517e+06	Ignimbrite	K-Ar Biotite	17.5±1.1	Naranjo and Cornejo (1992)
GN-259	529700	7.18367e+06	Andesite	Ar/Ar Hornblende	4.12±0.12	Naranjo et al. (2013b)
GN-259	529700	7.18367e+06	Andesite	Ar/Ar Biotite	4.09±0.05	Naranjo et al. (2013b)
GN-259	529700	7.18367e+06	Andesite	K-Ar Whole rock	3.7±0.6	Naranjo and Cornejo (1992)
GN-262	535822	7.185e+06	Andesite	K-Ar Whole rock	1.6±0.4	Naranjo and Cornejo (1992)
GN-271	504736	7.19481e+06	Ignimbrite	K-Ar Biotite	17.6±0.6	Naranjo and Cornejo (1992)
GN-276	508302	7.19933e+06	Andesite	K-Ar Whole rock	11.1±0.5	Naranjo and Cornejo (1992)
GN-277	507794	7.19981e+06	Hornblende andesite	K-Ar Whole rock	20.5±0.9	Naranjo and Cornejo (1992)
GN-289	519232	7.19461e+06	Andesite	K-Ar Whole rock	16.5±1.2	Naranjo and Cornejo (1992)
GN-291E	519749	7.19538e+06	Ignimbrite	K-Ar Biotite	22.1±0.9	Naranjo and Cornejo (1992)
GN-309	526254	7.18389e+06	Andesite	K-Ar Whole rock	4.7±0.5	Naranjo and Cornejo (1992)
GN-316A	529198	7.18766e+06	Andesite	K-Ar Whole rock	11.7±0.5	Naranjo and Cornejo (1992)
GN-318A	519591	7.18572e+06	Ignimbrite	K-Ar Biotite	19.9±1.6	Naranjo and Cornejo (1992)
GN-325D	505762	7.18269e+06	Ignimbrite	K-Ar Whole rock	15.6±2.5	Naranjo and Cornejo (1992)
GN-342A	505756	7.18184e+06	PJB bomb	K-Ar Whole rock	16.2±0.7	Naranjo and Cornejo (1992)
GN-345	501475	7.18252e+06	Andesite	K-Ar Whole rock	16.2±1.5	Naranjo and Cornejo (1992)
GN-36	536187	7.21999e+06	Andesite	K-Ar Whole rock	6.1±0.3	Naranjo and Cornejo (1992)
GN-360B	512282	7.2174e+06	Ignimbrite	K-Ar Biotite	18.2±0.7	Naranjo and Cornejo (1992)
GN-371	517996	7.18656e+06	Andesite	K-Ar Whole rock	17.3±0.7	Naranjo and Cornejo (1992)
GN-375A	521177	7.12527e+06	Ignimbrite	K-Ar Biotite	1.1±0.5	Naranjo and Cornejo (1992)
GN-377A	519501	7.12462e+06	Andesite	K-Ar Biotite	1.2±0.3	Naranjo and Cornejo (1992)
GN-384	516063	7.12793e+06	Andesite	K-Ar Whole rock	13.9±1.4	Naranjo and Cornejo (1992)
GN-385	514582	7.12515e+06	Andesite	K-Ar Whole rock	13.2±0.5	Naranjo and Cornejo (1992)
GN-387B	517520	7.12724e+06	Ignimbrite	K-Ar Biotite	1.4±0.6	Naranjo and Cornejo (1992)
GN-389	518527	7.13064e+06	Andesite	K-Ar Whole rock	16.6±1.6	Naranjo and Cornejo (1992)
GN-39	529270	7.22101e+06	Andesite	K-Ar Whole rock	7.5±0.5	Naranjo and Cornejo (1992)
GN-390	516293	7.13155e+06	Andesite	K-Ar Whole rock	16.3±1.0	Naranjo and Cornejo (1992)
GN-394	505586	7.13459e+06	PJB bomb	K-Ar Whole rock	13.4±1.1	Naranjo and Cornejo (1992)
GN-40	528951	7.22046e+06	Andesite	K-Ar Whole rock	6.9±0.3	Naranjo and Cornejo (1992)
GN-400	518233	7.13858e+06	Andesite	K-Ar Whole rock	13.2±0.7	Naranjo and Cornejo (1992)
GN-403A	517941	7.14755e+06	Ignimbrite	K-Ar Whole rock	23.2±1.0	Naranjo and Cornejo (1992)
GN-403C	518017	7.14741e+06	Ignimbrite	K-Ar Biotite	20.7±0.8	Naranjo and Cornejo (1992)
GN-404	517140	7.14773e+06	Andesite block	Ar/Ar Groundmass	5.07±0.10	Naranjo et al. (2013a)
GN-404	517140	7.14773e+06	Andesite block	K-Ar Whole rock	5.8±0.4	Naranjo and Cornejo (1992)
GN-407	501798	7.13359e+06	Andesite	K-Ar Biotite	12.9±0.5	Naranjo and Cornejo (1992)
GN-410	503093	7.13747e+06	Andesite	K-Ar Whole rock	18.0±0.9	Naranjo and Cornejo (1992)
GN-412A	520929	7.17959e+06	Hornblende andesite	K-Ar Whole rock	14.5±0.9	Naranjo and Cornejo (1992)
GN-416B	520742	7.17657e+06	Andesite	K-Ar Whole rock	5.2±0.3	Naranjo and Cornejo (1992)
GN-422	545186	7.17183e+06	Andesite	K-Ar Whole rock	7.3±0.5	Naranjo and Cornejo (1992)
GN-424	543305	7.17129e+06	Andesite	K-Ar Whole rock	7.3±0.6	Naranjo and Cornejo (1992)
GN-425A	540852	7.17264e+06	Andesite	K-Ar Whole rock	4.1±0.3	Naranjo and Cornejo (1992)
GN-429	542639	7.16943e+06	Andesite	K-Ar Whole rock	7.3±0.4	Naranjo and Cornejo (1992)
GN-432	539807	7.16467e+06	Vesicular andesite	K-Ar Whole rock	7.9±0.5	Naranjo and Cornejo (1992)
GN-436	536841	7.16275e+06	Andesite	K-Ar Whole rock	8.4±0.6	Naranjo and Cornejo (1992)
GN-439	537237	7.16573e+06	Andesite	K-Ar Whole rock	7.6±0.8	Naranjo and Cornejo (1992)
GN-440	546139	7.159e+06	Vesicular andesite	K-Ar Whole rock	8.6±0.6	Naranjo and Cornejo (1992)
GN-441	545852	7.15603e+06	Vesicular andesite	K-Ar Whole rock	7.7±0.4	Naranjo and Cornejo (1992)
GN-454	516521	7.18213e+06	Andesite	K-Ar Whole rock	16.0±0.6	Naranjo and Cornejo (1992)
GN-460	514431	7.17733e+06	Andesite	K-Ar Whole rock	15.8±2.7	Naranjo and Cornejo (1992)
GN-464	511804	7.18667e+06	BCB bomb	K-Ar Whole rock	16.4±1.7	Naranjo and Cornejo (1992)
GN-471A	500039	7.17265e+06	Ignimbrite	K-Ar Whole rock	16.0±0.9	Naranjo and Cornejo (1992)
GN-473	527015	7.17758e+06	Hornblende andesite	K-Ar Biotite	4.0±1.1	Naranjo and Cornejo (1992)
GN-47A	527252	7.21856e+06	Banded dacite	K-Ar Whole rock	12.5±0.9	Naranjo and Cornejo (1992)
GN-483	534712	7.17213e+06	Vesicular andesite	K-Ar Whole rock	5.1±0.5	Naranjo and Cornejo (1992)
GN-488	536722	7.17214e+06	Andesite	K-Ar Whole rock	6.7±0.5	Naranjo and Cornejo (1992)
GN-49	528634	7.21824e+06	Andesite	K-Ar Whole rock	6.0±0.7	Naranjo and Cornejo (1992)
GN-493	550537	7.14867e+06	Rhyodacite	K-Ar Biotite	10.5±0.7	Naranjo and Cornejo (1992)
GN-494	551783	7.14937e+06	Basaltic andesite	K-Ar Whole rock	8.0±0.4	Naranjo and Cornejo (1992)
GN-501	557162	7.14618e+06	Granodiorite	K-Ar Whole rock	246±6.0	Naranjo and Cornejo (1992)
GN-505A	548356	7.12567e+06	Andesite	K-Ar Biotite	2.0±0.5	Naranjo and Cornejo (1992)
GN-507B	549447	7.12858e+06	Ignimbrite	K-Ar Biotite	5.1±0.4	Naranjo and Cornejo (1992)
GN-514	543095	7.15236e+06	Dacitic dome	K-Ar Biotite	7.9±0.4	Naranjo and Cornejo (1992)
GN-515	542843	7.15072e+06	Dacitic dique	K-Ar Biotite	19.4±0.7	Naranjo and Cornejo (1992)
GN-518	542023	7.14514e+06	Andesite	K-Ar Whole rock	19.7±0.9	Naranjo and Cornejo (1992)
GN-519	540817	7.14199e+06	Ignimbrite	K-Ar Biotite	17.2±0.6	Naranjo and Cornejo (1992)
GN-520	542713	7.14014e+06	Andesite	K-Ar Whole rock	15.3±1.0	Naranjo and Cornejo (1992)
GN-528	547390	7.13649e+06	Andesite	K-Ar Whole rock	15.2±1.1	Naranjo and Cornejo (1992)
GN-543	510242	7.16243e+06	Ignimbrite	K-Ar Biotite	17.4±0.9	Naranjo and Cornejo (1992)
GN-544	507406	7.17809e+06	Andesite	K-Ar Whole rock	15.7±0.8	Naranjo and Cornejo (1992)
GN-545	509208	7.17667e+06	Andesite	K-Ar Whole rock	16.8±0.7	Naranjo and Cornejo (1992)
GN-546	508223	7.17419e+06	Andesite	K-Ar Whole rock	17.9±0.8	Naranjo and Cornejo (1992)
GN-552	507946	7.16979e+06	Andesite	K-Ar Whole rock	21.4±0.8	Naranjo and Cornejo (1992)
GN-553	507222	7.16927e+06	Andesite	K-Ar Whole rock	19.5±0.6	Naranjo and Cornejo (1992)
GN-555	507313	7.16607e+06	Ignimbrite	K-Ar Biotite	16.6±0.7	Naranjo and Cornejo (1992)
GN-561	503622	7.16979e+06	Andesite	K-Ar Whole rock	19.9±0.8	Naranjo and Cornejo (1992)
GN-56A	531494	7.21596e+06	Dacitic dome	K-Ar Whole rock	11.7±0.4	Naranjo and Cornejo (1992)
GN-571A	509226	7.16011e+06	Ignimbrite	K-Ar Biotite	17.7±1.4	Naranjo and Cornejo (1992)
GN-572B	509627	7.15962e+06	Ignimbrite	K-Ar Whole rock	18.0±0.7	Naranjo and Cornejo (1992)
GN-576	503754	7.17321e+06	Andesite	K-Ar Whole rock	15.9±0.9	Naranjo and Cornejo (1992)
GN-577	561657	7218603	Andesite	K-Ar Whole rock	0.9±0.3	Naranjo and Cornejo (1992)
GN-579	563502	7219556	Andesite	K-Ar Whole rock	1.8±0.6	Naranjo and Cornejo (1992)
GN-583	557491	7.21936e+06	Andesitic scoria	K-Ar Whole rock	3.8±0.9	Naranjo and Cornejo (1992)
GN-585	552461	7.22417e+06	Andesite	K-Ar Whole rock	4.2±0.3	Naranjo and Cornejo (1992)
GN-607	500078	7.16114e+06	Dacitic andesite	K-Ar Whole rock	20.9±1	Naranjo and Cornejo (1992)
GN-610A	507555	7.15566e+06	Vitric andesite	K-Ar Whole rock	13.6±0.9	Naranjo and Cornejo (1992)
GN-612	526813	7.1294e+06	Andesite	K-Ar Whole rock	16.2±2.7	Naranjo and Cornejo (1992)
GN-613	526223	7.13167e+06	Ignimbrite	K-Ar Biotite	5.3±0.5	Naranjo and Cornejo (1992)
GN-620	534529	7.13189e+06	Andesite	K-Ar Whole rock	17.1±0.7	Naranjo and Cornejo (1992)
GN-621	538327	7.12694e+06	Andesite	K-Ar Biotite	16.5±2.4	Naranjo and Cornejo (1992)
GN-626B	539549	7.12437e+06	Dacite	K-Ar Biotite	17.0±0.5	Naranjo and Cornejo (1992)
GN-636A	559946	7.22906e+06	Andesite	K-Ar Whole rock	8.0±0.3	Naranjo and Cornejo (1992)
GN-643	554846	7.21828e+06	Andesite	K-Ar Whole rock	1.8±0.5	Naranjo and Cornejo (1992)
GN-649B	529504	7.22251e+06	Andesite	K-Ar Whole rock	10.9±1.2	Naranjo and Cornejo (1992)
GN-652A	543455	7.17426e+06	Andesite	K-Ar Whole rock	7.0±0.5	Naranjo and Cornejo (1992)
GN-653	544319	7.17751e+06	Hornblende andesite	K-Ar Whole rock	4.5±0.5	Naranjo and Cornejo (1992)
GN-655	542450	7.17661e+06	Hornblende andesite	K-Ar Whole rock	7.2±0.3	Naranjo and Cornejo (1992)
GN-659	539389	7.17735e+06	Andesite	K-Ar Whole rock	4.9±0.5	Naranjo and Cornejo (1992)
GN-661	537896	7.17556e+06	Biotite dacite	K-Ar Biotite	6.0±0.7	Naranjo and Cornejo (1992)
GN-666	535064	7177546	Banded andesite	K-Ar Biotite	3.8±0.8	Naranjo and Cornejo (1992)
GN-667	537498	7.17853e+06	Andesite	Ar/Ar Groundmass	5.07±0.03	Naranjo et al. (2013a)
GN-667	537498	7.17853e+06	Andesite	K-Ar Whole rock	5.0±0.3	Naranjo and Cornejo (1992)
GN-67	528633	7.21209e+06	Andesite	K-Ar Biotite	12.3±0.4	Naranjo and Cornejo (1992)
GN-672	510410	7.1369e+06	Andesite	K-Ar Whole rock	14.2±1	Naranjo and Cornejo (1992)
GN-676B	532627	7.11652e+06	Ignimbrite	K-Ar Biotite	11.7±0.8	Naranjo and Cornejo (1992)
GN-676F	532627	7.11652e+06	Ignimbrite	K-Ar Biotite	12±0.7	Naranjo and Cornejo (1992)
GN-676I	532627	7.11652e+06	Ignimbrite	K-Ar Biotite	11.7±0.7	Naranjo and Cornejo (1992)
GN-676K	532627	7.11652e+06	Ignimbrite	K-Ar Biotite	11.2±0.5	Naranjo and Cornejo (1992)
GN-676O	532627	7.11652e+06	Ignimbrite	K-Ar Biotite	12.3±0.8	Naranjo and Cornejo (1992)
GN-684B	527463	7.1346e+06	Andesite	K-Ar Whole rock	15.7±0.7	Naranjo and Cornejo (1992)
GN-685	525280	7.13457e+06	Andesite	K-Ar Whole rock	19.2±0.9	Naranjo and Cornejo (1992)
GN-686B	525462	7.13413e+06	Ignimbrite	K-Ar Biotite	15.0±0.8	Naranjo and Cornejo (1992)
GN-688	523594	7.13544e+06	Basaltic andesite	K-Ar Whole rock	14.7±0.7	Naranjo and Cornejo (1992)
GN-690B	523093	7.13613e+06	Ignimbrite	K-Ar Biotite	15.8±0.6	Naranjo and Cornejo (1992)
GN-694A	524672	7.14077e+06	Ignimbrite	K-Ar Biotite	17.5±0.8	Naranjo and Cornejo (1992)
GN-695	524426	7.14147e+06	Ignimbrite	K-Ar Biotite	15.5±0.6	Naranjo and Cornejo (1992)
GN-705	528297	7.16149e+06	Andesite	K-Ar Whole rock	8.2±0.8	Naranjo and Cornejo (1992)
GN-708	530718	7.16306e+06	Andesite	K-Ar Whole rock	8.7±0.5	Naranjo and Cornejo (1992)
GN-70B	531153	7.20836e+06	Dacitic andesite	K-Ar Biotite	6.7±0.4	Naranjo and Cornejo (1992)
GN-712	533028	7.16718e+06	Banded andesite	Ar/Ar Hornblende	7.2±0.4	Naranjo et al. (2013a)
GN-712	533028	7.16718e+06	Banded andesite	K-Ar Whole rock	7.6±0.7	Naranjo and Cornejo (1992)
GN-714	530186	7.17138e+06	Andesite	K-Ar Hornblende	8.3±1.9	Naranjo and Cornejo (1992)
GN-717A	528735	7.15623e+06	Ignimbrite	K-Ar Biotite	21.8±1.2	Naranjo and Cornejo (1992)
GN-718B	528515	7.1561e+06	Ignimbrite	K-Ar Hornblende	17.0±3.2	Naranjo and Cornejo (1992)
GN-720	527255	7.155e+06	Andesite	K-Ar Whole rock	4.9±0.7	Naranjo and Cornejo (1992)
GN-721	527405	7.15588e+06	Andesite	K-Ar Whole rock	8.1±2.4	Naranjo and Cornejo (1992)
GN-734	549286	7.13673e+06	Andesite	K-Ar Whole rock	16.4±1.2	Naranjo and Cornejo (1992)
GN-737	525474	7.15642e+06	Andesite	K-Ar Whole rock	4.7±0.6	Naranjo and Cornejo (1992)
GN-739	522877	7.15665e+06	Andesite	K-Ar Whole rock	6.6±0.3	Naranjo and Cornejo (1992)
GN-740	520396	7.15837e+06	Andesite	K-Ar Whole rock	4.0±1.5	Naranjo and Cornejo (1992)
GN-742	515742	7.1616e+06	Andesite block	K-Ar Whole rock	7.6±0.8	Naranjo and Cornejo (1992)
GN-747C	513022	7.1532e+06	Andesite block	K-Ar Whole rock	14.6±0.6	Naranjo and Cornejo (1992)
GN-748A	517769	7.15367e+06	Andesite	K-Ar Whole rock	4.5±0.4	Naranjo and Cornejo (1992)
GN-754	522233	7.13637e+06	Andesite	K-Ar Whole rock	19.9±1.0	Naranjo and Cornejo (1992)
GN-755	522322	7.14796e+06	Andesite	K-Ar Whole rock	18.8±1.0	Naranjo and Cornejo (1992)
GN-756	522235	7.14856e+06	Andesite	K-Ar Whole rock	6.0±0.8	Naranjo and Cornejo (1992)
GN-775A	519359	7.13962e+06	Ignimbrite	K-Ar Biotite	16.5±0.8	Naranjo and Cornejo (1992)
GN-775A	519359	7.1396e+06	Ignimbrite	K-Ar Whole rock	16.6±0.6	Naranjo and Cornejo (1992)
GN-779	502064	7.14666e+06	Andesite	K-Ar Whole rock	19.4±1.3	Naranjo and Cornejo (1992)
GN-782	500711	7.14538e+06	Andesite	K-Ar Whole rock	17.5±0.9	Naranjo and Cornejo (1992)
GN-787	502177	7.14713e+06	Ignimbrite	K-Ar Biotite	16.6±1.0	Naranjo and Cornejo (1992)
GN-98	540211	7.22317e+06	Andesite	K-Ar Whole rock	5.3±1.9	Naranjo and Cornejo (1992)
GP-14B	519972	7.20477e+06	Andesite	K-Ar Biotite	12.6±0.8	Naranjo and Cornejo (1992)
GP-21	541659	7.19608e+06	Andesite	K-Ar Whole rock	1.6±0.4	Naranjo and Cornejo (1992)
ID-11	603242	7096829	Ignimbrite (matrix)	Ar/Ar Feldspar	3.605±0.005	Kraemer et al. (1999)
ID-13	594521	7103927	Andesite	Ar/Ar Plagioclase	3.61±0.02	Kraemer et al. (1999)
ID-16	614605	7123737	Tuff	K-Ar Sanidine	3.2±0.1	Kraemer et al. (1999)
ID-17	613389	7124711	Andesite	K-Ar Whole rock	4.6±0.2	Kraemer et al. (1999)
ID-18	593720	7127383	Tuff	K-Ar Biotite	22.5±0.6	Kraemer et al. (1999)
ID-20	602368	7178752	Andesite	Ar/Ar Feldspar	12.8±1.2	Kraemer et al. (1999)
ID-25	618595	7207272	Andesite	Ar/Ar Feldspar	10.7±0.7	Kraemer et al. (1999)
ID-26	634402	7208332	Andesite	Ar/Ar Feldspar	11±0.5	Kraemer et al. (1999)
ID-27	644377	7185215	Andesite	Ar/Ar Feldspar	5.96±0.03	Kraemer et al. (1999)
ID-3	616258	7146741	Gneiss	K-Ar Muscovite	419±8	Kraemer et al. (1999)
ID-30	641831	7144332	Basaltic andesite	Ar/Ar Glass	4.68±0.08	Kraemer et al. (1999)
ID-33	629416	7146255	Tuff	Ar/Ar Biotite	0.47±0.01	Kraemer et al. (1999)
ID-35	625559	7142461	Tuff	K-Ar Whole rock	4.6±0.5	Kraemer et al. (1999)
ID-36	657868	7148681	Dacite	Ar/Ar Feldspar	14.1±0.4	Kraemer et al. (1999)
ID-40	620020	7161745	Tuff	K-Ar Biotite	18.5±0.5	Kraemer et al. (1999)
ID-41	590488	7154457	Dacite	K-Ar Biotite	7.7±0.2	Kraemer et al. (1999)
ID-42	617969	7131590	Basaltic andesite	K-Ar Whole rock	5.2±0.3	Kraemer et al. (1999)
ID-46	666839	7182669	Andesite	K-Ar Whole rock	5.3±0.3	Kraemer et al. (1999)
ID-47	592898	7155703	Ignimbrite (pumice)	Ar/Ar Biotite	9.8±0.5	Kraemer et al. (1999)
ID-48	630805	7145401	Ignimbrite	Ar/Ar Feldspar	11.2±0.3	Kraemer et al. (1999)
ID-51	591123	7136175	Tuff	K-Ar Biotite	28.9±0.8	Kraemer et al. (1999)
ID-52	591117	7135438	Tuff	K-Ar Glass	18±0.6	Kraemer et al. (1999)
ID-53	661676	7220008	Tuff	K-Ar Biotite	9.3±0.2	Kraemer et al. (1999)
ID-56	641877	7175718	Andesite	Ar/Ar Plagioclase	4.8±0.5	Kraemer et al. (1999)
ID-6	649778	7212836	Tuff	K-Ar Hornblende	24.2±0.9	Kraemer et al. (1999)
ID-64	593887	7144283	Tuff	Ar/Ar Plagioclase	37.6±0.3	Kraemer et al. (1999)
ID-65	594351	7153873	Ignimbrite (pumice)	Ar/Ar Plagioclase	9.6±0.2	Kraemer et al. (1999)
ID-71	628410	7065045	Ignimbrite (pumice)	K-Ar Plagioclase	0.2±0.1	Kraemer et al. (1999)
ID-72	627889	7070061	Ignimbrite (pumice)	K-Ar Biotite	6.3±0.2	Kraemer et al. (1999)
ID-73	640361	7091594	Tuff	K-Ar Glass	1.7±0.01	Kraemer et al. (1999)
ID-8	580215	7149711	Tuff	Ar/Ar Feldspar	17.39±0.08	Kraemer et al. (1999)
ID-83	635492	7180990	Ignimbrite (pumice)	Ar/Ar Plagioclase	10.9±0.3	Kraemer et al. (1999)
ID-87	629485	7152664	Andesite	K-Ar Whole rock	7±0.3	Kraemer et al. (1999)
ID-9	591800	7078791	Basaltic andesite	Ar/Ar Glass	0.2±0.09	Kraemer et al. (1999)
ID-91	608999	7122849	Tuff	Ar/Ar Plagioclase	7.9±0.3	Kraemer et al. (1999)
ID-97	594046	7155359	Tuff	Ar/Ar Plagioclase	17.1±0.3	Kraemer et al. (1999)
JCO-1.1	493720	7049269			9.2	Schnurr et al. (2007)
JCO-20.1	532588	7.0696e+06	Andesite	K-Ar Biotite	1.1±0.5	Clavero et al. (1998)
JCO-20.5	527867	7.06939e+06	Andesite	K-Ar Whole rock	2.5±0.2	Clavero et al. (1998)
JCO-20.6	522914	7.06922e+06	Dacite	Ar/Ar Biotite	880±80(*)	Clavero et al. (1998)
JCO-23.2	525958	7.07257e+06	Andesite	Ar/Ar Biotite	358±13(*)	Clavero et al. (1998)
JCO-46.3	503882	7.085e+06	Ignimbrite	K-Ar Whole rock	18.7±0.7	Clavero et al. (1998)
JCO-48.2	546447	7086617	Basaltic andesite	K-Ar Whole rock	5.1±0.3	Clavero et al. (1998)
JCO-48.3	547916	7.08197e+06	Andesite	K-Ar Whole rock	5.9±0.4	Clavero et al. (1998)
JCO-48.4	541243	7.08353e+06	Andesite	K-Ar Whole rock	8.5±0.3	Clavero et al. (1998)
JCO-48.6	536485	7.08079e+06	Andesite	K-Ar Biotite	6.3±0.5	Clavero et al. (1998)
JCO-48.8	530512	7.08114e+06	Basalt	K-Ar Whole rock	7.7±0.4	Clavero et al. (1998)
JCO-48.9	527910	7.08842e+06	Dacite	K-Ar Whole rock	8.7±1.0	Clavero et al. (1998)
JCO-49.1	520786	7.07776e+06	Basaltic andesite	K-Ar Whole rock	9.2±0.8	Clavero et al. (1998)
JCO-50.4	544961	7.08699e+06	Dacite	K-Ar Biotite	9.0±0.8	Clavero et al. (1998)
JCO-51.10	534048	7.08755e+06	Andesite	K-Ar Whole rock	5.2±0.3	Clavero et al. (1998)
JCO-51.11	536035	7.08776e+06	Andesite	K-Ar Biotite	8.3±0.9	Clavero et al. (1998)
JCO-51.12	537511	7.08826e+06	Dacite	K-Ar Biotite	9.4±0.6	Clavero et al. (1998)
JCO-51.6	533663	7.07662e+06	Basaltic andesite	K-Ar Whole rock	5.7±0.4	Clavero et al. (1998)
JCO-51.7	532698	7.07796e+06	Basaltic andesite	K-Ar Whole rock	1.3±0.3	Clavero et al. (1998)
JCO-51.9	533324	7.08495e+06	Andesite	K-Ar Whole rock	8.1±0.5	Clavero et al. (1998)
JCO-52.1	543422	7.08977e+06	Basaltic andesite	K-Ar Whole rock	8.7±0.4	Clavero et al. (1998)
JCO-52.10	533445	7.09178e+06	Andesite	K-Ar Biotite	7.8±0.5	Clavero et al. (1998)
JCO-52.13	532096	7.09075e+06	Basaltic andesite	K-Ar Whole rock	6.4±0.3	Clavero et al. (1998)
JCO-52.3	540489	7.08935e+06	Ignimbrite	K-Ar Biotite	4.4±0.5	Clavero et al. (1998)
JCO-52.5	540500	7.09076e+06	Basaltic-andesite block	K-Ar Whole rock	9.7±0.4	Clavero et al. (1998)
JCO-52.7	537823	7.09291e+06	Andesite	K-Ar Whole rock	8.2±0.7	Clavero et al. (1998)
JCO-52.8	537004	7.09432e+06	Andesite	K-Ar Whole rock	7.6±0.4	Clavero et al. (1998)
JCO-53.2	531590	7.08806e+06	Dacite	K-Ar Biotite	7.6±0.8	Clavero et al. (1998)
JCO-53.3	532411	7.08742e+06	Andesite	K-Ar Whole rock	7.0±0.3	Clavero et al. (1998)
JCO-53.5	531446	7.08611e+06	Dacite	K-Ar Biotite	7.7±0.6	Clavero et al. (1998)
JCO-53.7	529936	7.08381e+06	Dacite	K-Ar Biotite	7.2±0.6	Clavero et al. (1998)
JCO-54.1	556667	7.10254e+06	Basaltic andesite	K-Ar Whole rock	8.7±0.6	Clavero et al. (1998)
JCO-54.2	555075	7.10626e+06	Ignimbrite	K-Ar Biotite	8.6±0.5	Clavero et al. (1998)
JCO-54.4	548828	7.11327e+06	Dacite	K-Ar Biotite	3.1±0.5	Clavero et al. (1998)
JCO-54.5	549879	7.11434e+06	Dacite	K-Ar Biotite	17.3±0.6	Clavero et al. (1998)
JCO-54.6	549524	7.12004e+06	Dacite	K-Ar Biotite	2.7±0.7	Clavero et al. (1998)
JCO-54.8	548471	7098357	Ignimbrite	K-Ar Biotite	9.8±0.8	Clavero et al. (1998)
JCO-55.1	518681	7.08779e+06	Dacite block	K-Ar Whole rock	18.5±1.1	Clavero et al. (1998)
JCO-55.2	515322	7.0903e+06	Dacite	K-Ar Whole rock	3.2±0.6	Clavero et al. (1998)
JCO-55.3	519554	7.09342e+06	Dacite	K-Ar Biotite	2.7±0.4	Clavero et al. (1998)
JCO-55.4	532289	7.09069e+06	Dacite	K-Ar Biotite	6.9±0.9	Clavero et al. (1998)
JCO-55.8	516433	7.0812e+06	Ignimbrite	K-Ar Biotite	22.0±0.9	Clavero et al. (1998)
JCO-69.2	512766	7.06926e+06	Dacite	K-Ar Whole rock	18.0±1.7	Clavero et al. (1998)
JCO-78.1	526299	7.11726e+06	Andesite	K-Ar Whole rock	5.9±0.6	Clavero et al. (1998)
JCO-78.3	534425	7.11611e+06	Ignimbrite	K-Ar Biotite	10.1±1.1	Clavero et al. (1998)
JCO-78.4	534839	7.11678e+06	Dacitic andesite	K-Ar Whole rock	18.1±0.8	Clavero et al. (1998)
JCO-79.1	550770	7.1164e+06	Dacitic porphyde	K-Ar Biotite	17.3±1.1	Clavero et al. (1998)
JCO-79.2	550870	7.11821e+06	Dacite	K-Ar Biotite	18.1±0.6	Clavero et al. (1998)
JCO-79.4	557231	7.12073e+06	Basaltic andesite	K-Ar Whole rock	11.1±0.6	Clavero et al. (1998)
JCO-79.5	557097	7.12196e+06	Ignimbrite	K-Ar Biotite	18.4±1.1	Clavero et al. (1998)
JCO-79.8	546627	7.12383e+06	Andesite	K-Ar Whole rock	16.3±0.8	Clavero et al. (1998)
JCO-80.1	551867	7.12082e+06	Dacite	K-Ar Biotite	2.3±0.3	Clavero et al. (1998)
JCO-80.3	552866	7.1161e+06	Ignimbrite	K-Ar Biotite	3.5±0.7	Clavero et al. (1998)
JCO-80.4	551826	7.11118e+06	Dacite	K-Ar Biotite	2.0±0.3	Clavero et al. (1998)
JCO-81.3	544211	7.11828e+06	Riodacita	K-Ar Biotite	16.8±0.9	Clavero et al. (1998)
JCO-81.5	540909	7.11806e+06	Basaltic andesite	K-Ar Whole rock	15.8±0.5	Clavero et al. (1998)
JCO-81.8	545066	7.11921e+06	Rhyolite	K-Ar Biotite	17.4±0.7	Clavero et al. (1998)
JCO-82.3	539792	7.11257e+06	Dacite	K-Ar Biotite	9.3±0.4	Clavero et al. (1998)
JCO-82.4	545727	7.10801e+06	Andesite	K-Ar Biotite	12.3±1.0	Clavero et al. (1998)
JCO-82.5	544641	7.10503e+06	Andesite	K-Ar Whole rock	10.7±1.0	Clavero et al. (1998)
JCO-83.2	538025	7.10413e+06	Dacite	K-Ar Biotite	10.3±0.7	Clavero et al. (1998)
JCO-83.3	539661	7.10129e+06	Andesite	K-Ar Whole rock	4.7±0.4	Clavero et al. (1998)
JCO-84.1	534018	7.10046e+06	Andesite	K-Ar Whole rock	6.9±0.3	Clavero et al. (1998)
JCO-84.10	531553	7.10299e+06	Dacite	K-Ar Biotite	10.5±0.5	Clavero et al. (1998)
JCO-84.2	535385	7.09538e+06	Basaltic andesite	K-Ar Whole rock	5.6±0.4	Clavero et al. (1998)
JCO-84.5	532481	7.09631e+06	Dacite	K-Ar Whole rock	5.4±0.4	Clavero et al. (1998)
JCO-84.6	532641	7.09784e+06	Andesite	K-Ar Whole rock	9.1±0.4	Clavero et al. (1998)
JCO-84.9	529835	7.1041e+06	Dacite	K-Ar Biotite	9.4±0.4	Clavero et al. (1998)
JCO-85.6	510331	7.08481e+06	Dacite block	Ar/Ar Hornblende	21.8±0.3	Clavero et al. (1998)
JCO-85.6	510331	7.08481e+06	Dacite block	K-Ar Whole rock	17.5±1.1	Clavero et al. (1998)
JCO-85.6	510331	7.08481e+06	Dacite block	K-Ar Whole rock	17.2±1.2	Clavero et al. (1998)
JCO-87.4	510136	7.07353e+06	Ignimbrite	K-Ar Hornblende	20.9±1.5	Clavero et al. (1998)
JCO-91.1	517729	7.07548e+06	Dacite block	K-Ar Whole rock	20.2±1.7	Clavero et al. (1998)
JCO-92.8	526250	7.08213e+06	Dacite	K-Ar Biotite	<1	Clavero et al. (1998)
JCO-93.5	520219	7.08945e+06	Dacite	K-Ar Whole rock	4.3±0.7	Clavero et al. (1998)
JCO-96.2	529011	7.1053e+06	Ignimbrite	K-Ar Biotite	4.1±0.9	Clavero et al. (1998)
JCO-96.5	530409	7.11271e+06	Andesite	K-Ar Whole rock	9.2±0.5	Clavero et al. (1998)
JCO-96.9	532416	7.11579e+06	Basaltic-andesite block	K-Ar Whole rock	8.4±0.5	Clavero et al. (1998)
JCO-97.6	533099	7.10873e+06	Dacite	K-Ar Whole rock	8.6±0.5	Clavero et al. (1998)
JCO-98.3	506375	7.08318e+06	Pumice	K-Ar Biotite	9.2±0.6	Clavero et al. (1998)
JCO-99.1	501070	7.08016e+06	Dacite block	K-Ar Biotite	18.8±0.9	Clavero et al. (1998)
JON-992b3	554006	7109744			10	Schnurr et al. (2007)
JUC-102	538015	7073050	Andesite	Ar/Ar Groundmass	431±12(*)	Polanco et al. (2014)
JUJ-002	526008	7072672	Dacitic andesite	Ar/Ar Groundmass	380±13(*)	Polanco et al. (2014)
JUJ-003	521699	7.07158e+06	Dacite	Ar/Ar Hornblende	600±300(*)	Polanco et al. (2014)
JUN-97-19b10	515118	7067152			6.1	Schnurr et al. (2007)
JUP1	532513	7.07282e+06	Pyroxene andesite	Ar/Ar Groundmass	1.07±0.02	Polanco et al. (2014)
JUP11	529023	7070529	Pyroxene dacite	Ar/Ar Hornblende	1.19±0.06	Polanco et al. (2014)
JUP11	529023	7070529	Pyroxene dacite	Ar/Ar Groundmass	712±17(*)	Polanco et al. (2014)
JUP13	527305	7071544	Dacite	Ar/Ar Groundmass	577±9(*)	Polanco et al. (2014)
JUP14	526623	7.07124e+06	Hornblende dacite	Ar/Ar Groundmass	502±6(*)	Polanco et al. (2014)
JUP15	531023	7.07356e+06	Dacite	Ar/Ar Hornblende	1.07±0.08	Polanco et al. (2014)
JUP18	525635	7074726	Dacite	Ar/Ar Hornblende	460±120(*)	Polanco et al. (2014)
JUP2	532895	7.07571e+06	Dacite	Ar/Ar Hornblende	700±30(*)	Polanco et al. (2014)
JUP3	531554	7076933	Andesite	Ar/Ar Groundmass	260±50(*)	Polanco et al. (2014)
JUP4	527236	7.0822e+06	Andesite	Ar/Ar Groundmass	480±60(*)	Polanco et al. (2014)
JUP5	528786	7080478	Andesite	Ar/Ar Groundmass	140±30(*)	Polanco et al. (2014)
JUP6	520148	7.07723e+06	Andesite	Ar/Ar Hornblende	250±110(*)	Polanco et al. (2014)
JUP7	518872	7074401	Pyroxene andesite	Ar/Ar Hornblende	690±100(*)	Polanco et al. (2014)
ME-96	500038	7.12244e+06	Hornblende dacite	K-Ar Whole rock	14.1±0.5	Cornejo and Mpodozis (1996)
PARI-2-17	555636	7126321			5.1	Schnurr et al. (2007)
PED-97-12	472064	7084417			10.7	Schnurr et al. (2007)
PED-97-5b6	475872	7105613			13.3	Schnurr et al. (2007)
SC-722	500839	7.10195e+06	Ignimbrite	K-Ar Biotite	3.6±0.3	Clavero et al. (1998)
SIA-169b1	559087	7149157			9.8	Schnurr et al. (2007)
SIA-57	590463	7160807			17.5	Schnurr et al. (2007)
SIA-72	584577	7058004			5.1	Schnurr et al. (2007)
SR-282	501846	7.10989e+06	Andesite	K-Ar Whole rock	14.2±0.6	Cornejo et al. (1993)

## Sheet: References
References in Supplementary material
Clavero, J., Gardeweg, M., and Mpodozis, C. 1998. Mapa Geológico Preliminar del área de Salar de Piedra Parada, Región de Atacama. Servicio Nacional de Geología y Minería, 1 mapa escala 1:100.000, Santiago.(*)
Cornejo, P., and Mpodozis C. 1996. Geología de la Región de Sierra Exploradora (Cordillera de Domeyko 25°-26°S). Servicio Nacional de Geología y Minería-CODELCO, Informe Registrado, IR-96-09: 330 p. 9 mapas escala 1:50.000.
Cornejo, P., Mpodozis, C., Ramírez, C.F. and Tomlinson, A.J. 1993. Estudio Geológico de la región de Potrerillos y El Salvador (26°-27° Lat.S). Servicio Nacional de Geología y Minería, Informe Registrado IR-93-1, 258p., 12 mapas escala 1:50.000, Santiago.
Kraemer, B., Adelmann, D., Alten, M., Schnurr, W., Erpenstein, K., Kiefer, E., van den Bogaard, P., and Görler, K. 1999. Incorporation of the Paleogene foreland into the Neogene Puna plateau: The Salar de Antofalla area, NW Argentina. Journal of South American Earth Sciences 12:157-182.
Naranjo, J.A. 2010. Geología del Complejo Volcánico Lastarria, Región de Antofagasta. Servicio Nacional de Geología y Minería, Carta Geológica de Chile, Serie Geología Básica, No. 123: 33 p., 1 mapa escala 1:25.000. Santiago.
Naranjo, J.A., and Cornejo, P. 1992. Hoja Salar de la Isla, Región de Atacama. Servicio Nacional de Geología y Minería, escala 1:250.000.
Naranjo, J.A., Villa, V., and Venegas, C. 2013a. Geología de las áreas Salar de Aguilar y Portezuelo del León Muerto, Región de Atacama. Servicio Nacional de Geología y Minería, Carta Geológica de Chile, Serie Geología Básica, Nos. 151-152, 1 mapa escala 1:100.000. Santiago.
Naranjo, J.A., Villa, V., and Venegas, C. 2013b. Geología de las áreas Salar de Pajonales y Cerro Moño, regiones de Antofagasta y Atacama. Servicio Nacional de Geología y Minería, Carta Geológica de Chile, Serie Geología Básica, Nos. 153-154, 1 mapa escala 1:100.000. Santiago.
Naranjo, J.A., Ramírez, C.A., and Villa, V. 2016. Geología de las áreas Cerro Panteón de Aliste y Cerro Colorado, Región de Atacama. Servicio Nacional de Geología y Minería, Carta Geológica de Chile, Serie Geología Básica, 1 mapa escala 1:100.000. Santiago.
Polanco, E., Clavero, J., and Arcos, R. 2014. Cadena volcánica Los Cuyanos-Sierra Nevada: geoquímica y edades 40Ar/39Ar, Zona Volcánica Central, Región de Atacama, Chile (26°26’S). XIX Congreso Geológico Argentino. Córdoba, Argentina.
Richards, J.P., and Villeneuve, M. 2002. Characteristics of late Cenozoic volcanism along the Archibarca lineament from Cerro Llullaillaco to Corrida de Cori, northwest Argentina. Journal of Volcanology and Geothermal Research 116: 161-200.
Richards, J.P., and Villeneuve, M. 2004. The Llullaillaco volcano, northwest Argentina: construction by Pleistocene volcanism and destruction by sector collapse. Journal of Volcanology and Geothermal Research 132: 337-365.
Richards, J.P., Ullrich, T., and Kerrich, R. 2006. The late Miocene–Quaternary Antofalla volcanic complex, southern Puna, NW Argentina: protracted history, diverse petrology, and economic potential. Journal of Volcanology and Geothermal Research 152: 197–239.
Richards, J.P., Jourdan, F., Creaser, R.A., Maldonado, G., and DuFrane, S.A. 2013. Geology, geochemistry, geochronology, and economic potential of Neogene volcanic rocks in the Laguna Pedernal and Salar de Aguas Calientes segments of the Archibarca lineament, northwest Argentina. Journal of Volcanology and Geothermal Research 258: 47–73.
Schnurr, W.B.W., Trumbull, R.B., Clavero, J., Hahne, K., Siebel, W., and Gardeweg, M. 2007. Twenty-five million years of silicic volcanism in the southern central volcanic zone of the Andes: Geochemistry and magma genesis of ignimbrites from 25 to 27 °S, 67 to 72 °W. Journal of Volcanology and Geothermal Research 166: 17–46.
